# Supplementary material
Source: Royal Society of Chemistry journal article supplement (doi:10.1039/d5dt03031e)
Supplement: d5dt03031e1.pdf [file d5dt03031e1.pdf]

## Supplementary Information

### **Formation of calcium-phosphate-based supra-ceramics in solutions containing glutaric acid derivatives**

Taishi Yokoi <sup>\*a</sup>, and Masakazu Kawashita <sup>a</sup>

<sup>a</sup> Laboratory for Biomaterials and Bioengineering, Institute of Integrated Research, Institute of Science Tokyo, 2-3-10 Kanda-Surugadai, Chiyoda-ku, Tokyo 101-0062, Japan

Corresponding Author

Taishi Yokoi

Laboratory for Biomaterials and Bioengineering, Institute of Integrated Research, Institute of Science, Tokyo, 2-3-10 Kanda-Surugadai, Chiyoda-ku, Tokyo 101-0062, Japan

E-mail: yokoi.taishi.bcr@tmd.ac.jp

## Synthesis of samples

Glutaric acid (25 mmol) ( $\text{HOOC}(\text{CH}_2)_3\text{COOH}$ : 99.0%, Tokyo Chemical Industry Co., Ltd., Tokyo, Japan), iminodiacetic acid (1–25 mmol) (IDAA,  $\text{HOOCCH}_2\text{NHCH}_2\text{COOH}$ : 98.0%, Tokyo Chemical Industry Co., Ltd.), diglycolic acid (1–10 mmol) (DGA,  $\text{HOOCCH}_2\text{OCH}_2\text{COOH}$ : 98.0%, Tokyo Chemical Industry Co., Ltd.), or 2,2'-thiodiglycolic acid (1–20 mmol) (TDGA,  $\text{HOOCCH}_2\text{SCH}_2\text{COOH}$ : 98.0%, Tokyo Chemical Industry Co., Ltd.) was dissolved in ultrapure water (100 mL) at 60 °C, and the pH of the solution was adjusted to 5.5 by adding an  $\text{NH}_3$  solution (28 mass% aqueous solution, Wako Pure Chemical Industries, Osaka, Japan). Subsequently, an  $\text{H}_3\text{PO}_4$  solution (5.0 mmol) (85% aqueous solution, Wako Pure Chemical Industries) was added to the carboxylic acid solution, followed by the addition of  $\text{CaCO}_3$  (8.0 mmol) (calcite phase: 99.5%, Nacalai Tesque, Kyoto, Japan). The slurry was stirred at 500 rpm at 60 °C. After 3 h, the pH of the slurry was reduced to 5.0 with HCl, and the precipitate was isolated by suction filtration, rinsed, and dried after 30 min of stirring.

$\text{H}_3\text{PO}_4$  (6.0 mmol) was added to ultrapure water (100 mL) at 60 °C under stirring (500 rpm) to synthesise the OCP sample that does not contain carboxylate ions, followed by the addition of  $\text{CaCO}_3$  (8.0 mmol). After 3 h, the pH of the slurry was decreased to 5.0 by adding an appropriate amount of an HCl solution. Subsequently, after 30 min of stirring at 60 °C, the precipitate was isolated by suction filtration using a conventional filter paper, rinsed with ultrapure water and ethanol, and dried overnight at 40 °C. This sample was denoted as CONTROL.

## XRD patterns of OCP with incorporated glutarate ions

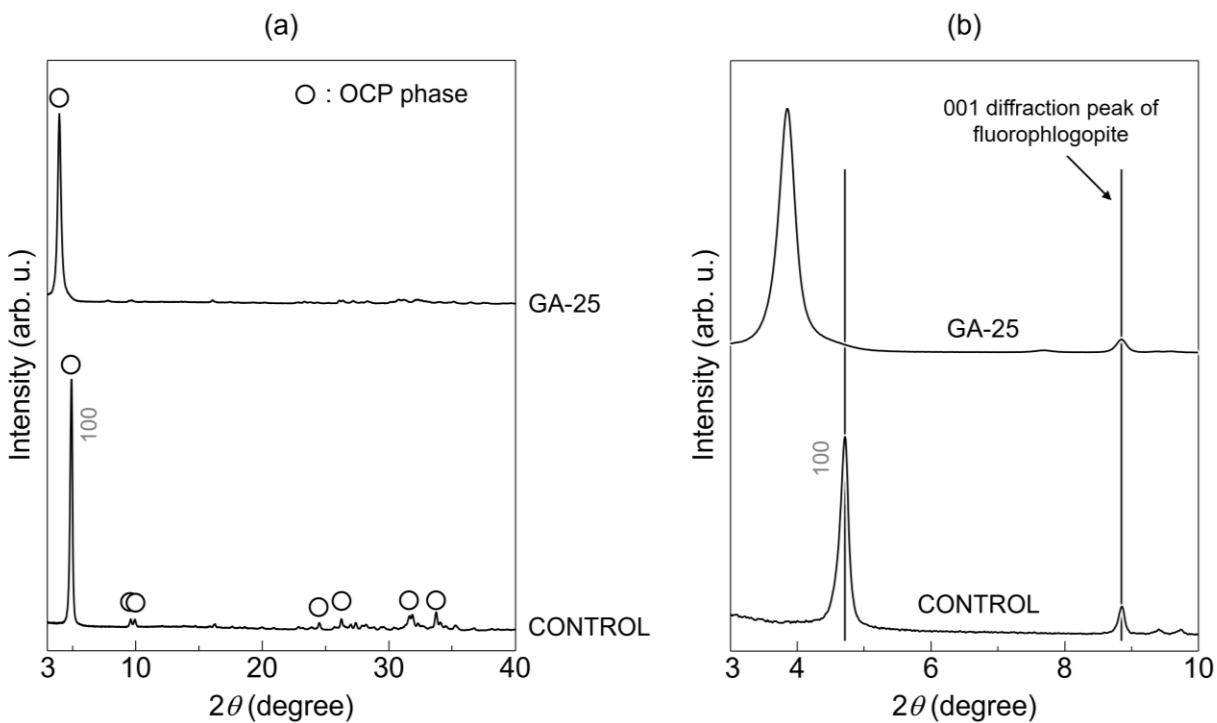

**Figure S1.** (a) XRD pattern of OCP synthesised in GA solution (GA-25). (b) Comparison of XRD patterns of CONTROL and GA-25 mixed with fluorophlogopite as an angular standard material.

**$pK_{a1}$  and  $pK_{a2}$  values of GA, IDAA, DGA, and TDGA**

**Table S1.**  $pK_{a1}$  and  $pK_{a2}$  values of carboxylic acids

| Carboxylic acid | $pK_{a1}$ | $pK_{a2}$ |
|-----------------|-----------|-----------|
| GA              | 4.34*     | 5.41*     |
|                 | 4.46      | 5.26      |
| IDAA            | 2.12      | 2.90      |
| DGA             | 2.96      | 3.75      |
| TDGA            | 3.38      | 4.18      |

\*The  $pK_{a1}$  and  $pK_{a2}$  values of GA are taken from reference 59.
